# Supplementary material for: A life-table model estimation of the parr capacity of a late 19th century Puget Sound steelhead population
Source: Atypon-hosted journal article supplement (doi:10.1139/facets-2015-0010), 2016-07-14
Supplement: facets-2015-0010_supplement1.pdf [file facets-2015-0010_supplement1.pdf]

## Supplementary Material 1. Tables

Table S1. Stage numbers, ages, numbers, and descriptions.

| Stage Number | Age | Stage Name     | Description        |
|--------------|-----|----------------|--------------------|
| 1            | 1   | Parr           |                    |
| 2            | 2   | Smolt          |                    |
| 3            | 3   | Age 3 Maiden S | Maiden that spawns |
| 4            | 3   | Age 3 Maiden H | Maiden harvested   |
| 5            | 3   | Age 3 Immature | Remaining in ocean |
| 6            | 4   | Age 4 Maiden S | Maiden that spawns |
| 7            | 4   | Age 4 Maiden H | Maiden harvested   |
| 8            | 4   | Age 4 Repeat S | Repeat that spawns |
| 9            | 4   | Age 4 Repeat H | Repeat harvested   |
| 10           | 4   | Age 4 Immature | Remaining in ocean |
| 11           | 5   | Age 5 Maiden S | Maiden that spawns |
| 12           | 5   | Age 5 Maiden H | Maiden harvested   |
| 13           | 5   | Age 5 Repeat S | Repeat that spawns |
| 14           | 5   | Age 5 Repeat H | Repeat harvested   |
| 15           | 5   | Age 5 Immature | Remaining in ocean |
| 16           | 6   | Age 6 Maiden S | Maiden that spawns |
| 17           | 6   | Age 6 Maiden H | Maiden harvested   |
| 18           | 6   | Age 6 Repeat S | Repeat that spawns |
| 19           | 6   | Age 6 Repeat H | Repeat harvested   |

Table S2. Fecundities, transition rates, and abbreviations used in the projection matrices.

| Parameter                                                                     | Values                          |
|-------------------------------------------------------------------------------|---------------------------------|
| Eggs/Age 3 Female                                                             | 3200                            |
| Eggs/Age 4 Maiden Female                                                      | 4000                            |
| Eggs/Age 4 Repeat Spawning Female                                             | 3400                            |
| Eggs/Age 5 Maiden Female                                                      | 5000                            |
| Eggs/Age 5 Repeat Spawning Female                                             | 4300                            |
| Eggs/Age 6 Maiden Female                                                      | 6000                            |
| Eggs/Age 6 Repeat Spawning Female                                             | 5400                            |
| sr (Proportion females)                                                       | 0.5                             |
| ef (Egg-fry survival)                                                         | 0.2                             |
| $\alpha$ (Fry-parr maximum survival rate)                                     | 0.2, 0.4                        |
| $\beta$ (Fry capacity parameter)                                              | Variable                        |
| fp (Fry-parr survival rate)                                                   | $\alpha/(1 + \text{fry}/\beta)$ |
| ps (Parr to smolt survival)                                                   | 0.3, 0.4                        |
| S23 (Smolt-Age 3 survival)                                                    | 0.2                             |
| Mat3 (proportion of ocean age 3 that mature)                                  | 0.0278,<br>0.0422               |
| Mat4 (proportion of ocean age 4 that mature)                                  | 0.2227,<br>0.3564               |
| Mat5 (proportion of ocean age 5 that mature)                                  | 0.3884,<br>0.4366               |
| Sp3S (proportion of age 3 maiden spawners that survive to re-enter the ocean) | 0.5                             |
| Sp4S (proportion of age 4 maiden spawners that survive to re-enter the ocean) | 0.6                             |
| Sp5S (proportion of age 5 maiden spawners that survive to re-enter the ocean) | 0.7                             |
| S34 (Ocean survival age 3 to age 4)                                           | 0.73, 0.92                      |
| S45 (Ocean survival age 4 to age 5)                                           | 0.74, 0.93                      |
| S56 (Ocean survival age 5- age 6)                                             | 0.75, 0.94                      |
