# Supplementary material for: A life-table model estimation of the parr capacity of a late 19th century Puget Sound steelhead population
Source: Atypon-hosted journal article supplement (doi:10.1139/facets-2015-0010), 2016-07-14
Supplement: facets-2015-0010_supplement2.pdf [file facets-2015-0010_supplement2.pdf]

## Supplementary Material 2

Equations used to estimate age/length-specific fecundities used in the model.

$$(A1) \quad \text{Egg\#} = \text{Exp}[(2.9 * \text{Ln}(\text{fork length}(\text{mm})) - 10.8 + (0.137^2/2)]$$

$$(A2) \quad \text{Wt}(\text{g}) = \text{Exp}[2.9 * \text{Ln}(\text{fork length}(\text{mm})) - 11.0 + (0.0733^2/2)]$$

Fork lengths (mm) and weights-at-age (g, lbs.):

Age 3: 670 mm, 2628 g, 5.79 lbs.

Age 4: 720 mm, 3237g, 7.14 lbs.

Age 5: 780 mm. 4083g, 9.0 lbs.

Age 6: 830 mm, 4889g, 10.78 lbs.
