# Supplementary material for: A life-table model estimation of the parr capacity of a late 19th century Puget Sound steelhead population
Source: Atypon-hosted journal article supplement (doi:10.1139/facets-2015-0010), 2016-07-14
Supplement: facets-2015-0010_supplement3.pdf [file facets-2015-0010_supplement3.pdf]

### **Supplementary Material 3**

Gibbons et al. surveyed tributary streams of several Puget Sound and Olympic Peninsula steelhead rivers and estimated parr numbers by conducting electrofishing removals in selected stream reaches. Data for sampled tributaries was reported only as parr per square meter (Gibbons et al. 1985, Table 1), so we were not able to further compare Gibbons et al.'s rearing density estimates for tributaries to ours. Several large rivers were sampled and parr counted by snorkeling. The snorkel count data was reported in Table 3 of Gibbons et al. 1985 and included the lengths, widths, and total area of sampled reaches in addition to the total number of steelhead parr counted. The total length of rivers reaches sampled ranged from 400 to 1100 meters. Parr densities were determined by dividing the total parr counts by the calculated total area of the sampled reaches.

We compared our model-based estimates of parr densities to Gibbons et al.'s estimates for mainstem river reaches by translating their estimates to parr-per-square meters mainstem rearing habitat area as defined in our approach, after first excluding two river reaches discarded by Gibbons et al. as being from under-seeded habitats and one whose width was less than 8 meters. We calculated the adjusted total rearing areas of each reach from total reach lengths of the 15 remaining river reaches by multiplying total length by 4, 6, and 8 meters as we did for our estimates of historically available mainstem rearing habitat area. These adjusted areas represent the rearing habitat area that would have been estimated by Gibbons et al. if the only habitat information they had were the reach lengths and they estimated rearing habitat area from these lengths following the approach we used to estimate historical rearing habitat area. We then divided the total parr counts reported for each mainstem reach by the three estimated rearing habitat areas to rescale

Gibbon's et al.'s parr densities to the approach we employed to estimate mainstem rearing area.

Table S4. Mainstem steelhead parr rearing densities re-scaled to shallow shoreline widths of 2, 3, and 4 meters each bank. SH Parr = steelhead parr. BW<sub>x</sub>= total nearshore bank width (4, 6, or 8 meters). Densities BW<sub>x</sub> = Parr/square meter at BW<sub>x</sub>.

| River             | Total L (m) | SH Parr | BW =4 | Densities BW4 | BW = 6 | Densities BW6 | BW =8 | Densities BW8 |
|-------------------|-------------|---------|-------|---------------|--------|---------------|-------|---------------|
| Bogachiel 1       | 751         | 466     | 3004  | 0.155         | 4506   | 0.103         | 6008  | 0.078         |
| Bogachiel 2       | 517         | 344     | 2068  | 0.166         | 3102   | 0.111         | 4136  | 0.083         |
| Sol Duc 1         | 596         | 497     | 2384  | 0.208         | 3576   | 0.139         | 4768  | 0.104         |
| Sol Duc 2         | 546         | 1217    | 2184  | 0.557         | 3276   | 0.371         | 4368  | 0.279         |
| Sol Duc 3         | 905         | 468     | 3620  | 0.129         | 5430   | 0.086         | 7240  | 0.065         |
| Sol Duc 4         | 739         | 551     | 2956  | 0.186         | 4434   | 0.124         | 5912  | 0.093         |
| W.F.              | 1011        | 308     | 4044  | 0.076         | 6066   | 0.051         | 8088  | 0.038         |
| Humptulips        |             |         |       |               |        |               |       |               |
| Humptulips        | 1142        | 197     | 4568  | 0.043         | 6852   | 0.029         | 9136  | 0.022         |
| E.F. Satsop       | 818         | 349     | 3272  | 0.107         | 4908   | 0.071         | 6544  | 0.053         |
| S. F. Priarie Cr. | 838         | 375     | 3352  | 0.112         | 5028   | 0.075         | 6704  | 0.056         |
| Green 1           | 425         | 512     | 1700  | 0.301         | 2550   | 0.201         | 3400  | 0.151         |
| Green 2           | 659         | 520     | 2636  | 0.197         | 3954   | 0.132         | 5272  | 0.099         |
| Green 3           | 837         | 259     | 3348  | 0.077         | 5022   | 0.052         | 6696  | 0.039         |
| Tolt              | 577         | 432     | 2308  | 0.187         | 3462   | 0.125         | 4616  | 0.094         |
| Snoqualmie        | 624         | 212     | 2496  | 0.085         | 3744   | 0.057         | 4992  | 0.042         |
